# Supplementary material for: Joint Estimation of Contamination, Error and Demography for Nuclear DNA from Ancient Humans
Source: PubMed Central journal article supplement (PMC4822957; doi:10.1371/journal.pgen.1005972), 2016-04-06
Supplement: pgen.1005972.s003.pdf [file pgen.1005972.s003.pdf]

| Contaminant panel | Anchor panel | Error rate                  | Contamination rate          | Modern human drift       | Neanderthal drift        | Log-posterior mode |
|-------------------|--------------|-----------------------------|-----------------------------|--------------------------|--------------------------|--------------------|
| EUR               | AFR          | 0.295%<br>(0.284% – 0.306%) | 5.568%<br>(5.472% – 5.673%) | 0.425<br>(0.423 – 0.429) | 4.984<br>(4.95 – 5)      | -883632.4637       |
| AMR               | AFR          | 0.316%<br>(0.3% – 0.322%)   | 5.333%<br>(5.261% – 5.48%)  | 0.426<br>(0.422 – 0.428) | 4.994<br>(4.952 – 4.999) | -884312.5366       |
| SAS               | AFR          | 0.328%<br>(0.317% – 0.341%) | 5.203%<br>(5.097% – 5.313%) | 0.426<br>(0.422 – 0.428) | 4.996<br>(4.946 – 4.999) | -884684.3521       |
| EAS               | AFR          | 0.393%<br>(0.379% – 0.402%) | 4.53%<br>(4.48% – 4.684%)   | 0.423<br>(0.421 – 0.426) | 4.99<br>(4.887 – 4.999)  | -885493.7081       |
| AFR               | AFR          | 0.515%<br>(0.5% – 0.525%)   | 0.007%<br>(0.002% – 0.126%) | 0.406<br>(0.403 – 0.409) | 1.756<br>(1.701 – 1774)  | -889165.6704       |
